# Supplementary material for: Taxonomic status of Coryphophylax maximiliani Fitzinger in: Steindachner, 1867 with notes on Coryphophylax subcristatus (Blyth, “1860” 1861)
Source: PeerJ. 2025 Sep 19;13:e19841. doi: 10.7717/peerj.19841 (PMC12452941; doi:10.7717/peerj.19841)
Supplement: Supplemental Information 3 [file peerj-13-19841-s003.xls]

## Sheet: MatrixOutput
		1	2	3	4	5	6	7	8	9	10	11	12	13	14	15	16	17	18	19	20	21	22	23	24	25	26	27	28	29	30	31	32	33	34	35	36	37	38	39	40	41	42	43	44	45	46
1	Gonocephalus pyrius
2	C. maximiliani sk03CS58	0.140805
3	Coryphophylax sp.1 sk03CS31	0.110609	0.0286533
4	C. subcristatus Havelock	0.115909	0.0606936	0.031746
5	Coryphophylax sp.2 sk03cs19	0.112867	0.034384	0.0202703	0.0430839
6	C. subcristatus Sk03cs23	0.118182	0.0549133	0.0362812	0.0294785	0.0408163
7	C. subcristatus sk03cs24	0.112941	0.0549133	0.0305164	0.0234742	0.0328638	0.00234192
8	C. brevicauda sk04cp4	0.117647	0.0775862	0.0519187	0.0657596	0.0541761	0.0657596	0.0610329
9	C. maximiliani sk03cs3	0.11138	0.0200573	0.0144928	0.0413625	0.0193237	0.0389294	0.0365854	0.0556901
10	C. subcristatus sk03cs38	0.125	0.0751445	0.0385488	0.015873	0.0544218	0.0385488	0.0328638	0.0748299	0.053528
11	C. maximiliani sk03cs15	0.116216	0.0173913	0.0107817	0.0407609	0.0161725	0.0353261	0.0353261	0.0567568	0.0056338	0.0543478
12	C. brevicauda sk04cp11	0.124434	0.0775862	0.0586907	0.0725624	0.0609481	0.0725624	0.0680751	0.00677201	0.0581114	0.0816327	0.0648649
13	C. maximiliani sk03cs14	0.116625	0.0200573	0.0123762	0.0399002	0.0173267	0.0374065	0.035	0.0545906	0.0049505	0.0523691	0.00289855	0.0545906
14	C. subcristatus sk03cs47	0.135501	0.0698413	0.0432432	0.0108108	0.0513514	0.0324324	0.0298103	0.0756757	0.0432432	0.0189189	0.0514469	0.0756757	0.0459459
15	C. subcristatus sk03cs48	0.13	0.066474	0.042394	0.00997506	0.0498753	0.032419	0.03	0.0773067	0.0448878	0.0174564	0.0497076	0.0773067	0.0448878	0
16	C. subcristatus sk03cs49	0.13	0.066474	0.042394	0.00997506	0.0498753	0.032419	0.03	0.0773067	0.0448878	0.0174564	0.0497076	0.0773067	0.0448878	0	0
17	C. subcristatus sk03cs50	0.13	0.066474	0.042394	0.00997506	0.0498753	0.032419	0.03	0.0773067	0.0448878	0.0174564	0.0497076	0.0773067	0.0448878	0	0	0
18	C. subcristatus sk03cs51	0.13	0.066474	0.042394	0.00997506	0.0498753	0.032419	0.03	0.0773067	0.0448878	0.0174564	0.0497076	0.0773067	0.0448878	0	0	0	0
19	Coryphophylax sp.2 sk03cs17	0.119107	0.034384	0.019802	0.0448878	0	0.0374065	0.035	0.057072	0.0173267	0.0573566	0.0173913	0.057072	0.0173267	0.0513514	0.0498753	0.0498753	0.0498753	0.0498753
20	Coryphophylax sp.2 sk03cs20	0.119107	0.034384	0.019802	0.0448878	0	0.0374065	0.035	0.057072	0.0173267	0.0573566	0.0173913	0.057072	0.0173267	0.0513514	0.0498753	0.0498753	0.0498753	0.0498753	0
21	C. subcristatus sk03cs39	0.125	0.0606936	0.0349127	0	0.0448878	0.0274314	0.025	0.0723192	0.0399002	0.0174564	0.0438596	0.0723192	0.0399002	0.0108108	0.00997506	0.00997506	0.00997506	0.00997506	0.0448878	0.0448878
22	C. subcristatus sk03cs40	0.125	0.0606936	0.0349127	0	0.0448878	0.0274314	0.025	0.0723192	0.0399002	0.0174564	0.0438596	0.0723192	0.0399002	0.0108108	0.00997506	0.00997506	0.00997506	0.00997506	0.0448878	0.0448878	0
23	C. subcristatus sk03cs42	0.135	0.0751445	0.042394	0.0174564	0.0573566	0.0374065	0.035	0.0822943	0.0523691	0	0.0584795	0.0822943	0.0523691	0.0189189	0.0174564	0.0174564	0.0174564	0.0174564	0.0573566	0.0573566	0.0174564	0.0174564
24	C. maximiliani sk03cs33	0.114144	0.017192	0.00990099	0.0374065	0.0148515	0.0349127	0.0325	0.0521092	0.00247525	0.0498753	0	0.0521092	0.00247525	0.0432432	0.042394	0.042394	0.042394	0.042394	0.0148515	0.0148515	0.0374065	0.0374065	0.0498753
25	C. maximiliani sk03cs34	0.114144	0.017192	0.00990099	0.0374065	0.0148515	0.0349127	0.0325	0.0521092	0.00247525	0.0498753	0	0.0521092	0.00247525	0.0432432	0.042394	0.042394	0.042394	0.042394	0.0148515	0.0148515	0.0374065	0.0374065	0.0498753	0
26	C. maximiliani sk03cs35	0.114144	0.017192	0.00990099	0.0374065	0.0148515	0.0349127	0.0325	0.0521092	0.00247525	0.0498753	0	0.0521092	0.00247525	0.0432432	0.042394	0.042394	0.042394	0.042394	0.0148515	0.0148515	0.0374065	0.0374065	0.0498753	0	0
27	C. maximiliani sk03cs2	0.119107	0.0229226	0.0148515	0.042394	0.019802	0.0399002	0.0375	0.057072	0.00742574	0.0548628	0.0057971	0.057072	0.00247525	0.0459459	0.0473815	0.0473815	0.0473815	0.0473815	0.019802	0.019802	0.042394	0.042394	0.0548628	0.0049505	0.0049505	0.0049505
28	C. maximiliani sk03cs4	0.116625	0.0200573	0.0123762	0.0399002	0.0173267	0.0374065	0.035	0.0545906	0.0049505	0.0523691	0.00289855	0.0545906	0	0.0459459	0.0448878	0.0448878	0.0448878	0.0448878	0.0173267	0.0173267	0.0399002	0.0399002	0.0523691	0.00247525	0.00247525	0.00247525	0.00247525
29	C. maximiliani sk03cs13	0.116625	0.0200573	0.0123762	0.0399002	0.0173267	0.0374065	0.035	0.0545906	0.0049505	0.0523691	0.00289855	0.0545906	0	0.0459459	0.0448878	0.0448878	0.0448878	0.0448878	0.0173267	0.0173267	0.0399002	0.0399002	0.0523691	0.00247525	0.00247525	0.00247525	0.00247525	0
30	C. subcristatus sk03cs21	0.12	0.0549133	0.032419	0.0249377	0.0349127	0.00248756	0	0.0648379	0.0349127	0.0349127	0.0380117	0.0648379	0.0349127	0.0297297	0.0299252	0.0299252	0.0299252	0.0299252	0.0349127	0.0349127	0.0249377	0.0249377	0.0349127	0.032419	0.032419	0.032419	0.0374065	0.0349127	0.0349127
31	C. subcristatus sk03cs22	0.114144	0.017192	0.00990099	0.0374065	0.0148515	0.0349127	0.0325	0.0521092	0.00247525	0.0498753	0	0.0521092	0.00247525	0.0432432	0.042394	0.042394	0.042394	0.042394	0.0148515	0.0148515	0.0374065	0.0374065	0.0498753	0	0	0	0.0049505	0.00247525	0.00247525	0.032419
32	C. maximiliani sk03cs5	0.12963	0.0315186	0.0290237	0.0558511	0.0343008	0.0558511	0.0531915	0.0740741	0.0237467	0.0691489	0.0141643	0.0740741	0.0215633	0.0563798	0.0625	0.0625	0.0625	0.0625	0.0350404	0.0350404	0.0570652	0.0570652	0.0706522	0.0188679	0.0188679	0.0188679	0.0215633	0.0215633	0.0215633	0.0543478	0.0188679
33	C. maximiliani sk03cs7	0.114144	0.017192	0.00990099	0.0374065	0.0148515	0.0349127	0.0325	0.0521092	0.00247525	0.0498753	0	0.0521092	0.00247525	0.0432432	0.042394	0.042394	0.042394	0.042394	0.0148515	0.0148515	0.0374065	0.0374065	0.0498753	0	0	0	0.0049505	0.00247525	0.00247525	0.032419	0	0.0188679
34	C. maximiliani sk03cs8	0.119403	0.017192	0.0148883	0.0425	0.0198511	0.04	0.0375	0.0572139	0.00744417	0.055	0	0.0572139	0.00744417	0.0487805	0.0475	0.0475	0.0475	0.0475	0.0198511	0.0198511	0.0425	0.0425	0.055	0.00496278	0.00496278	0.00496278	0.00992556	0.00744417	0.00744417	0.0375	0.00496278	0.0215633	0.00496278
35	C. maximiliani sk03cs6	0.114144	0.017192	0.00990099	0.0374065	0.0148515	0.0349127	0.0325	0.0521092	0.00247525	0.0498753	0	0.0521092	0.00247525	0.0432432	0.042394	0.042394	0.042394	0.042394	0.0148515	0.0148515	0.0374065	0.0374065	0.0498753	0	0	0	0.0049505	0.00247525	0.00247525	0.032419	0	0.0188679	0	0.00496278
36	C. maximiliani sk03cs9	0.111663	0.0200573	0.0123762	0.0374065	0.0173267	0.0374065	0.035	0.0545906	0.0049505	0.0498753	0.00289855	0.0545906	0.0049505	0.0432432	0.042394	0.042394	0.042394	0.042394	0.0173267	0.0173267	0.0374065	0.0374065	0.0498753	0.00247525	0.00247525	0.00247525	0.00742574	0.0049505	0.0049505	0.0349127	0.00247525	0.0161725	0.00247525	0.00744417	0.00247525
37	C. maximiliani sk03cs11	0.114144	0.017192	0.00990099	0.0374065	0.0148515	0.0349127	0.0325	0.0521092	0.00247525	0.0498753	0	0.0521092	0.00247525	0.0432432	0.042394	0.042394	0.042394	0.042394	0.0148515	0.0148515	0.0374065	0.0374065	0.0498753	0	0	0	0.0049505	0.00247525	0.00247525	0.032419	0	0.0188679	0	0.00496278	0	0.00247525
38	C. maximiliani sk03cs16	0.116625	0.0200573	0.0123762	0.0399002	0.0173267	0.0374065	0.035	0.0545906	0.0049505	0.0523691	0.00289855	0.0545906	0	0.0459459	0.0448878	0.0448878	0.0448878	0.0448878	0.0173267	0.0173267	0.0399002	0.0399002	0.0523691	0.00247525	0.00247525	0.00247525	0.00247525	0	0	0.0349127	0.00247525	0.0215633	0.00247525	0.00744417	0.00247525	0.0049505	0.00247525
39	C. subcristatus sk03cs36	0.114144	0.017192	0.00990099	0.0374065	0.0148515	0.0349127	0.0325	0.0521092	0.00247525	0.0498753	0	0.0521092	0.00247525	0.0432432	0.042394	0.042394	0.042394	0.042394	0.0148515	0.0148515	0.0374065	0.0374065	0.0498753	0	0	0	0.0049505	0.00247525	0.00247525	0.032419	0	0.0188679	0	0.00496278	0	0.00247525	0	0.00247525
40	C. subcristatus sk03cs37	0.135	0.0751445	0.042394	0.0174564	0.0573566	0.0374065	0.035	0.0822943	0.0523691	0	0.0584795	0.0822943	0.0523691	0.0189189	0.0174564	0.0174564	0.0174564	0.0174564	0.0573566	0.0573566	0.0174564	0.0174564	0	0.0498753	0.0498753	0.0498753	0.0548628	0.0523691	0.0523691	0.0349127	0.0498753	0.0706522	0.0498753	0.055	0.0498753	0.0498753	0.0498753	0.0523691	0.0498753
41	C. maximiliani sk03cs10	0.114144	0.017192	0.00990099	0.0374065	0.0148515	0.0349127	0.0325	0.0521092	0.00247525	0.0498753	0	0.0521092	0.00247525	0.0432432	0.042394	0.042394	0.042394	0.042394	0.0148515	0.0148515	0.0374065	0.0374065	0.0498753	0	0	0	0.0049505	0.00247525	0.00247525	0.032419	0	0.0188679	0	0.00496278	0	0.00247525	0	0.00247525	0	0.0498753
42	C. subcristatus sk03cs12	0.12	0.0549133	0.032419	0.0249377	0.0349127	0.00248756	0	0.0648379	0.0349127	0.0349127	0.0380117	0.0648379	0.0349127	0.0297297	0.0299252	0.0299252	0.0299252	0.0299252	0.0349127	0.0349127	0.0249377	0.0249377	0.0349127	0.032419	0.032419	0.032419	0.0374065	0.0349127	0.0349127	0	0.032419	0.0543478	0.032419	0.0375	0.032419	0.0349127	0.032419	0.0349127	0.032419	0.0349127	0.032419
43	C. maximiliani SK03CS52	0.124069	0.0268657	0.0173267	0.0448878	0.0247525	0.0473815	0.0414508	0.0545906	0.0102564	0.0573566	0.00906344	0.0545906	0.0102564	0.0459459	0.0516796	0.0516796	0.0516796	0.0516796	0.0230769	0.0230769	0.0465116	0.0465116	0.0594315	0.00769231	0.00769231	0.00769231	0.0128205	0.0102564	0.0102564	0.0413437	0.00769231	0.0280112	0.00769231	0.0128535	0.00769231	0.0102564	0.00769231	0.0102564	0.00769231	0.0594315	0.00769231	0.0413437
44	C. maximiliani SK03CS54	0.116071	0.0248227	0.0148368	0.0299401	0.0207715	0.0359281	0.033033	0.047619	0.00296736	0.0479042	0.00359712	0.047619	0.00593472	0.0359281	0.0359281	0.0359281	0.0359281	0.0359281	0.0207715	0.0207715	0.0299401	0.0299401	0.0479042	0.00296736	0.00296736	0.00296736	0.00593472	0.00593472	0.00593472	0.0329341	0.00296736	0.0131579	0.00296736	0.00892857	0.00296736	0.00296736	0.00296736	0.00593472	0.00296736	0.0479042	0.00296736	0.0329341	0.00296736
45	C. maximiliani SK03CS56	0.128947	0.0366972	0.0262467	0.0502646	0.0314961	0.047619	0.0449735	0.0605263	0.015748	0.0634921	0.0185759	0.0605263	0.0183727	0.0514905	0.0555556	0.0555556	0.0555556	0.0555556	0.0314961	0.0314961	0.0502646	0.0502646	0.0634921	0.015748	0.015748	0.015748	0.0183727	0.0183727	0.0183727	0.0449735	0.015748	0.0315186	0.015748	0.0209974	0.015748	0.0183727	0.015748	0.0183727	0.015748	0.0634921	0.015748	0.0449735	0.015748	0.00892857
46	C. subcristatus SK03CS44	0.135	0.0635838	0.0498753	0.0249377	0.0598504	0.0473815	0.045	0.0872818	0.0548628	0.0274314	0.0497076	0.0872818	0.0548628	0.0243243	0.0249377	0.0249377	0.0249377	0.0249377	0.0598504	0.0598504	0.0249377	0.0249377	0.0274314	0.0523691	0.0523691	0.0523691	0.0573566	0.0548628	0.0548628	0.0448878	0.0523691	0.0625	0.0523691	0.0575	0.0523691	0.0523691	0.0523691	0.0548628	0.0523691	0.0274314	0.0523691	0.0448878	0.0568475	0.0508982	0.0634921
47	C. subcristatus SK03cs45	0.1325	0.0693642	0.042394	0.0074813	0.0523691	0.0349127	0.0325	0.0798005	0.0473815	0.0149626	0.0526316	0.0798005	0.0473815	0.00810811	0.0074813	0.0074813	0.0074813	0.0074813	0.0523691	0.0523691	0.0074813	0.0074813	0.0149626	0.0448878	0.0448878	0.0448878	0.0498753	0.0473815	0.0473815	0.032419	0.0448878	0.0652174	0.0448878	0.05	0.0448878	0.0448878	0.0448878	0.0473815	0.0448878	0.0149626	0.0448878	0.032419	0.0542636	0.0389222	0.0582011	0.0224439

## Sheet: Caption
Table. Estimates of Evolutionary Divergence between Sequences
The number of base differences per site from between sequences are shown. This analysis involved 47 nucleotide sequences. All ambiguous positions were removed for each sequence pair (pairwise deletion option). There were a total of 446 positions in the final dataset. Evolutionary analyses were conducted in MEGA11 [1]
1. Tamura K., Stecher G., and Kumar S. (2021). MEGA 11: Molecular Evolutionary Genetics Analysis Version 11. Molecular Biology and Evolution https://doi.org/10.1093/molbev/msab120.
Disclaimer: Although utmost care has been taken to ensure the correctness of the caption, the caption text is provided "as is" without any warranty of any kind. Authors advise the user to carefully check the caption prior to its use for any purpose and report any errors or problems to the authors immediately (www.megasoftware.net). In no event shall the authors and their employers be liable for a…
