# Supplementary material for: Taxonomic status of Coryphophylax maximiliani Fitzinger in: Steindachner, 1867 with notes on Coryphophylax subcristatus (Blyth, “1860” 1861)
Source: PeerJ. 2025 Sep 19;13:e19841. doi: 10.7717/peerj.19841 (PMC12452941; doi:10.7717/peerj.19841)
Supplement: Supplemental Information 4 [file peerj-13-19841-s004.xlsx]

## Sheet: Sheet1
Species	Voucher	Sex	SVL	HL	HW	HH	TrL	LAL	CL
Coryphophylax subcristatus	BNHS 1654	male	75	23.2	13	10.9	36.34	15.88	23.66
Coryphophylax subcristatus	BNHS 1655	female	70	23.1	11.4	8.64	32	14.74	21.62
Coryphophylax subcristatus	BNHS 1656	female	73	21.3	11.52	9.64	34	15.7	23.5
Coryphophylax subcristatus	BNHS 1657	male	80	23.5	12.4	11.16	39	16	23
Coryphophylax subcristatus	BNHS 976(1)	male	76.3	20.6	13.3	10	29.8	14.5	22.9
Coryphophylax subcristatus	BNHS 975	male	72.1	22.5	12.8	10.1	31.1	14.3	20.8
Coryphophylax maximiliani	NHMV 20976:5	male	90	29.7	16.1	14.4	40	15.2	23.9
Coryphophylax maximiliani	ZMUC R36998	male	94	30.3	17.5	16.3	35.1	19.9	27.2
Coryphophylax maximiliani	ZMUC R36312	male	95.4	30	18.8	13.9	39	17.6	27
Coryphophylax maximiliani	ZSI 5041	male	108	33.1	19	16.8	45	19.7	28.9
Coryphophylax maximiliani	ZMB 5854	male	95	29.1	15.1	14	41	17.1	26
Coryphophylax maximiliani	BNHS 674	male	92.9	30.1	16.9	15.3	38.1	17.4	24.8
Coryphophylax brevicauda	ZSIC 25962	male	63.6	20.74	11.67	9.91	26	15.18	20.65
Coryphophylax brevicauda	ZSIC 25963	female	55.45	17.3	9.5	8.93	25	12.63	17.79
Coryphophylax brevicauda	ZSIC 25964	male	63.72	19.67	10.86	9.57	29.19	14.39	19.71
