# Supplementary material for: Taxonomic status of Coryphophylax maximiliani Fitzinger in: Steindachner, 1867 with notes on Coryphophylax subcristatus (Blyth, “1860” 1861)
Source: PeerJ. 2025 Sep 19;13:e19841. doi: 10.7717/peerj.19841 (PMC12452941; doi:10.7717/peerj.19841)
Supplement: Supplemental Information 5 [file peerj-13-19841-s005.xlsx]

## Sheet: Sheet1
PC	Eigenvalue	% variance
1	0.00319802	45.661
2	0.00217552	31.062
3	0.000923371	13.184
4	0.00043817	6.2562
5	0.000217824	3.1101
6	5.09113e-05	0.72691
	PC 1	PC 2
HL	-0.12142	0.21864
HW	-0.31346	0.32343
HH	-0.45184	0.56242
TrL	0.37613	-0.25985
LAL	0.55852	0.62279
CL	0.47898	0.27549
